# Supplementary material
Source: PubMed Central journal article supplement (PMC2665091)
Supplement: M807365200_1.pdf [file M807365200_1.pdf]

**Figure S1**

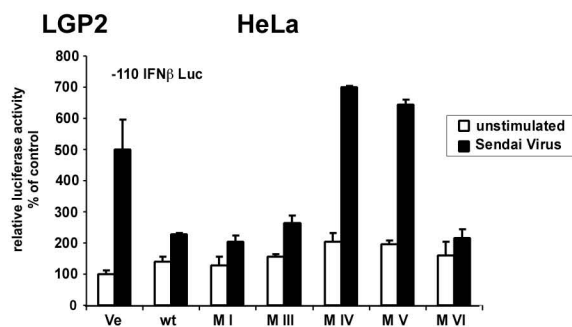

Figure S1: Luciferase reporter gene assay measuring the IFN $\beta$  promotor activity in HeLa cells after transfection for expression of LGP2 wild type and mutant proteins. Cells were left unstimulated (white) or infected with  $3 \times 10^6$  PFU Sendai virus (black) for 6h before harvest.

**Figure S2**

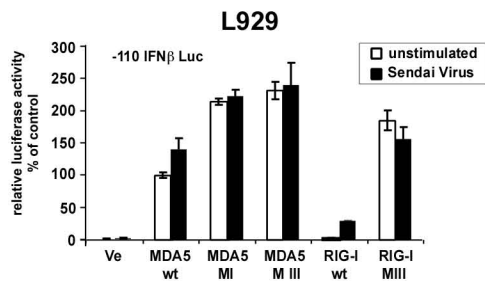

Figure S2: Luciferase reporter gene assay measuring the IFN $\beta$  promotor activity in L929 cells after transfection for expression of MDA5 and RIG-I wild type and mutant proteins. Cells were left unstimulated (white) or infected with  $3 \times 10^6$  PFU Sendai virus (black) for 6h before harvest.
